# Supplementary material for: Extreme NMR shielding in fluoro-nitrogen cations
Source: Royal Society of Chemistry journal article supplement (doi:10.1039/d3cp03399f), 2023-01-01
Supplement: d3cp03399f1.pdf [file d3cp03399f1.pdf]

# Supporting Information for: **Extreme NMR shielding in fluoro-nitrogen cations**

David J. D. Wilson\*

*Department of Chemistry, La Trobe Institute for Molecular Science, La Trobe University,  
Melbourne, Victoria 3086, Australia*

E-mail: david.wilson@latrobe.edu.au

# Optimized geometries

CCSD(T)-F12b/cc-pVQZ-F12 optimized geometries. Units of Angstrom and degrees. Energies in atomic units (hartrees).

## HNF<sup>+</sup>

CCSD(T)-F12/VQZ-F12 ENERGY=-154.51715792

Cartesian coordinates

|   |              |               |               |
|---|--------------|---------------|---------------|
| N | 0.0000000000 | 0.0844114665  | -0.6779960208 |
| H | 0.0000000000 | -0.9130568102 | -1.0288827041 |
| F | 0.0000000000 | -0.0137916648 | 0.5544433865  |

Z-matrix

N  
H 1 rNH  
F 1 rNF 2 A1

rNH = 1.05738566  
rNF = 1.23634572  
A1 = 104.82490219

## H<sub>2</sub>NF<sup>2+</sup>

CCSD(T)-F12/VQZ-F12 ENERGY=-154.42521370

Cartesian coordinates

|   |              |               |               |
|---|--------------|---------------|---------------|
| N | 0.0000000000 | 0.0000000000  | -0.6240345715 |
| F | 0.0000000000 | 0.0000000000  | 0.5772636214  |
| H | 0.0000000000 | 0.9890872097  | -1.1044416754 |
| H | 0.0000000000 | -0.9890872097 | -1.1044416754 |

Z-matrix

N  
F 1 rNF  
H 1 rNH 2 a1  
H 1 rNH 2 a1 3 d180

rNF = 1.20129819  
rNH = 1.09958378  
a1 = 115.90619474  
d180 = 180.0

## NF<sup>2+</sup>

CCSD(T)-F12/VQZ-F12 ENERGY=-152.99508217

Cartesian coordinates

|   |              |              |               |
|---|--------------|--------------|---------------|
| N | 0.0000000000 | 0.0000000000 | -0.6319771217 |
| F | 0.0000000000 | 0.0000000000 | 0.4659293705  |

Z-matrix

N  
F 1 rNF

rNF = 1.09790866

## N<sub>2</sub>F<sup>+</sup>

CCSD(T)-F12/VQZ-F12 ENERGY=-208.65723959

Cartesian coordinates

|   |              |              |               |
|---|--------------|--------------|---------------|
| N | 0.0000000000 | 0.0000000000 | -1.2795424426 |
| N | 0.0000000000 | 0.0000000000 | -0.1745238334 |
| F | 0.0000000000 | 0.0000000000 | 1.0720201118  |

Z-matrix

N  
N 1 rNN  
X 2 rdum 1 a90  
F 2 rNF 3 a90 1 d180

rNN = 1.10501861  
rNF = 1.24654395  
rdum = 1.0  
a90 = 90.0  
d180 = 180.0

## NF<sub>2</sub><sup>+</sup>

CCSD(T)-F12/VQZ-F12 ENERGY=-253.66767274

Cartesian coordinates

|   |              |               |               |
|---|--------------|---------------|---------------|
| N | 0.0000000000 | 0.0000000000  | -0.5350756265 |
| F | 0.0000000000 | 1.0056807990  | 0.1972440467  |
| F | 0.0000000000 | -1.0056807990 | 0.1972440467  |

Z-matrix

N  
F 1 rNF  
F 1 rNF 2 A1

rNF = 1.24406028  
A1 = 107.87705777

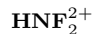

CCSD(T)-F12/VQZ-F12 ENERGY=-253.53844643

Cartesian coordinates

|   |              |               |               |
|---|--------------|---------------|---------------|
| N | 0.0000000000 | 0.0000000000  | 0.4275350284  |
| H | 0.0000000000 | 0.0000000000  | 1.5473158919  |
| F | 0.0000000000 | 1.0351069554  | -0.1986471300 |
| F | 0.0000000000 | -1.0351069554 | -0.1986471300 |

Z-matrix

N  
H 1 rNH  
F 1 rNF 2 a1  
F 1 rNF 2 a1 3 d180

rNH = 1.11978086  
rNF = 1.20977291  
a1 = 121.17160618  
d180 = 180.0

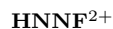

CCSD(T)-F12/VQZ-F12 ENERGY=-208.56054817

Cartesian coordinates

|   |              |              |               |
|---|--------------|--------------|---------------|
| N | 0.0000000000 | 0.0000000000 | -1.2056079358 |
| N | 0.0000000000 | 0.0000000000 | -0.1173096807 |
| H | 0.0000000000 | 0.0000000000 | -2.3070546140 |
| F | 0.0000000000 | 0.0000000000 | 1.0977282042  |

Z-matrix

N  
X 1 rdum  
N 1 rNN 2 a90  
X 3 rdum 1 a90 2 d0  
H 1 rNH 2 a90 3 d180  
F 3 rNF 4 a90 1 d180

rNN = 1.08829826  
rNH = 1.10144668  
rNF = 1.21503788  
rdum = 1.0  
a90 = 90.0  
d180 = 180.0  
d0 = 0.0

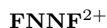

CCSD(T)-F12/VQZ-F12 ENERGY=-307.58026622

Cartesian coordinates

|   |              |              |               |
|---|--------------|--------------|---------------|
| N | 0.0000000000 | 0.0000000000 | -0.5444296863 |
| N | 0.0000000000 | 0.0000000000 | 0.5444296863  |
| F | 0.0000000000 | 0.0000000000 | -1.7749606383 |
| F | 0.0000000000 | 0.0000000000 | 1.7749606383  |

Z-matrix

N  
X 1 rdum  
N 1 rNN 2 a90  
X 3 rdum 1 a90 2 d0  
F 1 rNF 2 a90 3 d180  
F 3 rNF 4 a90 1 d180

rNN = 1.08885937  
rNF = 1.23053095  
rdum = 1.0  
a90 = 90.0  
d180 = 180.0  
d0 = 0.0

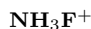

CCSD(T)-F12/VQZ-F12 ENERGY=-155.90582058

Cartesian coordinates

|   |               |               |               |
|---|---------------|---------------|---------------|
| N | 0.0000000000  | 0.0000000000  | -0.6913614851 |
| F | 0.0000000000  | 0.0000000000  | 0.6690373904  |
| H | 0.4897408197  | 0.8482559822  | -1.0010348012 |
| H | 0.4897408197  | -0.8482559822 | -1.0010348012 |
| H | -0.9794816393 | 0.0000000000  | -1.0010348012 |

Z-matrix

N  
F 1 rNF  
H 1 rNH 2 A1  
H 1 rNH 2 A1 3 D120  
H 1 rNH 2 A1 4 D120

rNF = 1.36039888  
rNH = 1.02726912  
A1 = 107.54489214  
D120 = 120.0

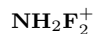

CCSD(T)-F12/VQZ-F12 ENERGY=-254.98888768

Cartesian coordinates

|   |               |               |               |
|---|---------------|---------------|---------------|
| N | 0.0000000000  | 0.0000000000  | -0.5238828584 |
| F | -1.0856876744 | 0.0000000000  | 0.2503404140  |
| F | 1.0856876744  | 0.0000000000  | 0.2503404140  |
| H | 0.0000000000  | 0.8729865391  | -1.0785692161 |
| H | 0.0000000000  | -0.8729865391 | -1.0785692161 |

Z-matrix

N  
X 1 rDUM  
F 1 rNF 2 AXNF  
F 1 rNF 2 AXNF 3 D180  
H 1 rNH 2 AXNH 3 D90  
H 1 rNH 2 AXNH 3 DM90

rNF = 1.33346894

rNH = 1.03430288

AXNF = 54.50665398

AXNH = 122.43144265

rDUM = 1.0

D180 = 180.0

D90 = 90.0

DM90 = -90.0

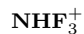

CCSD(T)-F12/VQZ-F12 ENERGY=-354.08036129

Cartesian coordinates

|   |               |               |               |
|---|---------------|---------------|---------------|
| N | 0.0000000000  | 0.0000000000  | 0.3450243545  |
| H | 0.0000000000  | 0.0000000000  | 1.3875910735  |
| F | 0.6168713479  | -1.0684525163 | -0.1093295609 |
| F | -1.2337426959 | 0.0000000000  | -0.1093295609 |
| F | 0.6168713479  | 1.0684525163  | -0.1093295609 |

Z-matrix

N  
H 1 rNH  
F 1 rNF 2 A1  
F 1 rNF 2 A1 3 D120  
F 1 rNF 2 A1 4 D120

rNH = 1.04256672

rNF = 1.31474656

A1 = 110.21738155

D120 = 120.0

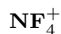

CCSD(T)-F12/VQZ-F12 ENERGY=-453.16816733

Cartesian coordinates

|   |               |               |               |
|---|---------------|---------------|---------------|
| N | 0.0000000000  | 0.0000000000  | 0.0000000000  |
| F | 1.0654360405  | 0.0000000000  | 0.7533770492  |
| F | -1.0654360405 | 0.0000000000  | 0.7533770492  |
| F | 0.0000000000  | 1.0654360405  | -0.7533770492 |
| F | 0.0000000000  | -1.0654360405 | -0.7533770492 |

Z-matrix

N  
F 1 RNF  
F 1 RNF 2 TDA  
F 1 RNF 2 TDA 3 D120  
F 1 RNF 2 TDA 4 D120

RNF = 1.30488733

TDA = 109.471220634490692

D120 = 120.0

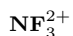

CCSD(T)-F12/VQZ-F12 ENERGY=-352.61609865

Cartesian coordinates

|   |               |               |              |
|---|---------------|---------------|--------------|
| N | 0.0000000000  | 0.0000000000  | 0.0000000000 |
| F | 0.6100994513  | -1.0567232473 | 0.0000000000 |
| F | -1.2201989025 | 0.0000000000  | 0.0000000000 |
| F | 0.6100994513  | 1.0567232473  | 0.0000000000 |

Z-matrix

N  
F 1 rNF  
F 1 rNF 2 a120  
F 1 rNF 2 a120 3 d180

rNF = 1.22019890

a120 = 120.0

d180 = 180.0

**ONHF<sup>+</sup>**

CCSD(T)-F12/VQZ-F12 ENERGY=-229.74914950

## Cartesian coordinates

|   |              |               |               |
|---|--------------|---------------|---------------|
| N | 0.0000000000 | 0.3913225761  | 0.1526888397  |
| O | 0.0000000000 | -0.2384478488 | 1.1053255819  |
| H | 0.0000000000 | 1.4363348113  | 0.0811508685  |
| F | 0.0000000000 | -0.1639008671 | -1.0477200685 |

## Z-matrix

N  
 O 1 RNO  
 H 1 RNH 2 A1  
 F 1 RNF 2 A2 3 D180

RNO = 1.14198404  
 RNH = 1.04745800  
 RNF = 1.32259390  
 A1 = 127.38411258  
 A2 = 121.71016023  
 D180 = 180.0

**ONF<sub>2</sub><sup>+</sup>**

CCSD(T)-F12/VQZ-F12 ENERGY=-328.83732082

## Cartesian coordinates

|   |              |               |               |
|---|--------------|---------------|---------------|
| N | 0.0000000000 | 0.0000000000  | 0.1566425650  |
| O | 0.0000000000 | 0.0000000000  | 1.2888274251  |
| F | 0.0000000000 | 1.0581542659  | -0.6004323342 |
| F | 0.0000000000 | -1.0581542659 | -0.6004323342 |

## Z-matrix

N  
 O 1 RNO  
 F 1 RNF 2 A1  
 F 1 RNF 2 A1 3 D180

RNO = 1.13218486  
 RNF = 1.30109679  
 A1 = 125.58248547  
 D180 = 180.0

**ONF<sup>2+</sup>**

CCSD(T)-F12/VQZ-F12 ENERGY=-228.27767191

## Cartesian coordinates

|   |              |              |               |
|---|--------------|--------------|---------------|
| N | 0.0000000000 | 0.0000000000 | -0.1073356824 |
| F | 0.0000000000 | 0.0000000000 | 1.0820153164  |
| O | 0.0000000000 | 0.0000000000 | -1.1908661781 |

## Z-matrix

N  
 X 1 rdum  
 F 1 rNF 2 a90  
 O 1 rNO 2 a90 3 d180

rNF = 1.1893510  
 rNO = 1.0835305  
 rdum = 1.0  
 a90 = 90.0  
 d180 = 180.0

# Equilibrium geometry shielding

NMR shielding of N-F cations as a function of basis set and wave function expansion.

Table S1: Calculated equilibrium  $^{19}\text{F}$  NMR shielding in NF cations. Units of ppm.

| Contribution <sup>a</sup>                   | Basis Set |         |         |         |         |         | CBS     |
|---------------------------------------------|-----------|---------|---------|---------|---------|---------|---------|
|                                             | DZ        | TZ      | QZ      | 5Z      | 6Z      | 7Z      |         |
| <b><math>\text{N}_2\text{F}^+</math></b>    |           |         |         |         |         |         |         |
| SCF                                         | 106.68    | 100.79  | 96.81   | 95.01   | 94.47   | 94.35   | 94.32   |
| $\Delta\text{SD}$                           | 54.94     | 40.74   | 40.55   |         |         |         | 40.42   |
| $\Delta(\text{T})$                          | -2.01     | -0.21   | -0.31   |         |         |         | -0.38   |
| $\Delta\text{T}$                            | 0.18      | -0.44   |         |         |         |         | -0.44   |
| $\Delta\text{Q}^b$                          | 0.05      |         |         |         |         |         | 0.05    |
| Sum                                         |           |         |         |         |         |         | 133.97  |
| <b><math>\text{NF}_2^+</math></b>           |           |         |         |         |         |         |         |
| SCF                                         | -532.07   | -552.05 | -564.14 | -569.28 | -570.81 | -571.11 | -571.18 |
| $\Delta\text{SD}$                           | 125.94    | 90.60   | 90.52   |         |         |         | 90.46   |
| $\Delta(\text{T})$                          | 10.39     | 12.84   | 12.42   |         |         |         | 12.12   |
| $\Delta\text{T}$                            | -5.70     | -5.82   |         |         |         |         | -5.82   |
| $\Delta\text{Q}^b$                          | -0.91     |         |         |         |         |         | -0.91   |
| Sum                                         |           |         |         |         |         |         | -475.33 |
| <b><math>\text{NH}_3\text{F}^+</math></b>   |           |         |         |         |         |         |         |
| SCF                                         | 318.74    | 315.28  | 313.09  | 312.35  | 312.11  | 312.06  | 312.05  |
| $\Delta\text{SD}$                           | -1.33     | -6.38   | -5.98   |         |         |         | -5.68   |
| $\Delta(\text{T})$                          | -2.09     | -2.00   | -2.14   |         |         |         | -2.24   |
| $\Delta\text{T}$                            | -0.42     | -0.25   |         |         |         |         | -0.25   |
| $\Delta\text{Q}^b$                          | -0.44     |         |         |         |         |         | -0.44   |
| Sum                                         |           |         |         |         |         |         | 303.44  |
| <b><math>\text{NH}_2\text{F}_2^+</math></b> |           |         |         |         |         |         |         |
| SCF                                         | 206.64    | 200.98  | 197.78  | 196.53  | 196.12  | 196.04  | 196.02  |
| $\Delta\text{SD}$                           | -2.24     | -8.97   | -8.72   |         |         |         | -8.55   |
| $\Delta(\text{T})$                          | -5.36     | -5.72   | -5.95   |         |         |         | -6.12   |
| $\Delta\text{T}$                            | -0.84     | -0.75   |         |         |         |         | -0.75   |
| $\Delta\text{Q}^b$                          | -0.59     |         |         |         |         |         | -0.59   |
| Sum                                         |           |         |         |         |         |         | 180.02  |

Continued on next page

| continued                           |           |         |         |         |         |         |         |
|-------------------------------------|-----------|---------|---------|---------|---------|---------|---------|
| Contribution <sup>a</sup>           | Basis Set |         |         |         |         |         | CBS     |
|                                     | DZ        | TZ      | QZ      | 5Z      | 6Z      | 7Z      |         |
| <b>NHF<sub>3</sub><sup>+</sup></b>  |           |         |         |         |         |         |         |
| SCF                                 | 111.09    | 104.73  | 100.64  | 98.95   | 98.41   | 98.30   | 98.27   |
| ΔSD                                 | -0.88     | -10.17  | -10.25  |         |         |         | -10.31  |
| Δ(T)                                | -7.76     | -8.29   | -8.59   |         |         |         | -8.81   |
| ΔT <sup>b</sup>                     | -0.94     | -0.87   |         |         |         |         | -0.87   |
| Sum                                 |           |         |         |         |         |         | 78.27   |
| <b>NF<sub>4</sub><sup>+</sup></b>   |           |         |         |         |         |         |         |
| SCF                                 | 31.62     | 25.57   | 20.77   | 18.74   | 18.08   | 17.95   | 17.91   |
| ΔSD                                 | 7.94      | -4.67   | -5.32   |         |         |         | -5.79   |
| Δ(T)                                | -8.22     | -8.59   | -8.91   |         |         |         | -9.15   |
| ΔT <sup>b</sup>                     | -0.69     | -0.66   |         |         |         |         | -0.66   |
| Sum                                 |           |         |         |         |         |         | 2.30    |
| <b>ONHF<sup>+</sup></b>             |           |         |         |         |         |         |         |
| SCF                                 | -145.48   | -159.56 | -166.93 | -170.00 | -170.93 | -171.11 | -171.16 |
| ΔSD                                 | 35.94     | 16.74   | 17.30   |         |         |         | 17.71   |
| Δ(T)                                | -16.34    | -17.25  | -17.88  |         |         |         | -18.35  |
| ΔT                                  | -3.96     | -4.08   |         |         |         |         | -4.08   |
| ΔQ <sup>b</sup>                     | -1.86     |         |         |         |         |         | -1.86   |
| Sum                                 |           |         |         |         |         |         | -177.73 |
| <b>ONF<sub>2</sub><sup>+</sup></b>  |           |         |         |         |         |         |         |
| SCF                                 | -110.77   | -121.10 | -127.77 | -130.61 | -131.48 | -131.65 | -131.69 |
| ΔSD                                 | 53.06     | 33.60   | 33.21   |         |         |         | 32.92   |
| Δ(T)                                | -8.18     | -7.30   | -7.63   |         |         |         | -7.87   |
| ΔT                                  | -1.24     | -1.52   |         |         |         |         | -1.52   |
| Sum                                 |           |         |         |         |         |         | -108.17 |
| <b>HNF<sub>2</sub><sup>2+</sup></b> |           |         |         |         |         |         |         |
| SCF                                 | -448.94   | -473.59 | -484.78 | -489.45 | -490.86 | -491.14 | -491.21 |
| ΔSD                                 | 61.43     | 33.04   | 32.78   |         |         |         | 32.60   |
| Δ(T)                                | 8.32      | 8.48    | 7.78    |         |         |         | 7.26    |
| ΔT                                  | -3.71     | -4.04   |         |         |         |         | -4.04   |
| ΔQ <sup>b</sup>                     | -2.89     |         |         |         |         |         | -2.89   |
| Sum                                 |           |         |         |         |         |         | -458.27 |

Continued on next page

| continued                     |           |         |         |         |         |         |         |
|-------------------------------|-----------|---------|---------|---------|---------|---------|---------|
| Contribution <sup>a</sup>     | Basis Set |         |         |         |         |         | CBS     |
|                               | DZ        | TZ      | QZ      | 5Z      | 6Z      | 7Z      |         |
| HNNF <sup>2+</sup>            |           |         |         |         |         |         |         |
| SCF                           | 79.86     | 72.67   | 68.09   | 66.16   | 65.57   | 65.45   | 65.41   |
| $\Delta$ SD                   | 69.95     | 55.52   | 55.31   |         |         |         | 55.15   |
| $\Delta$ (T)                  | 1.10      | 3.51    | 3.53    |         |         |         | 3.54    |
| $\Delta$ T                    | -0.26     | -0.96   |         |         |         |         | -0.96   |
| $\Delta$ Q <sup>b</sup>       | 0.68      |         |         |         |         |         | 0.68    |
| Sum                           |           |         |         |         |         |         | 123.83  |
| FNNF <sup>2+</sup>            |           |         |         |         |         |         |         |
| SCF                           | 45.69     | 39.13   | 34.28   | 32.16   | 31.52   | 31.39   | 31.36   |
| $\Delta$ SD                   | 91.73     | 75.42   | 74.97   |         |         |         | 74.65   |
| $\Delta$ (T)                  | 4.01      | 7.10    | 7.20    |         |         |         | 7.26    |
| $\Delta$ T                    | -0.18     | -0.95   |         |         |         |         | -0.95   |
| Sum                           |           |         |         |         |         |         | 112.32  |
| NF <sub>3</sub> <sup>2+</sup> |           |         |         |         |         |         |         |
| SCF                           | -328.45   | -344.64 | -353.96 | -358.01 | -359.22 | -359.46 | -359.52 |
| $\Delta$ SD                   | 95.99     | 69.51   | 68.64   |         |         |         | 68.02   |
| $\Delta$ (T)                  | 10.42     | 12.66   | 12.45   |         |         |         | 12.30   |
| $\Delta$ T                    | -1.91     | -2.69   |         |         |         |         | -2.69   |
| Sum                           |           |         |         |         |         |         | -281.90 |
| ONF <sup>2+</sup>             |           |         |         |         |         |         |         |
| SCF                           | -51.73    | -60.92  | -66.94  | -69.41  | -70.19  | -70.35  | -70.39  |
| $\Delta$ SD                   | 110.46    | 92.12   | 91.91   |         |         |         | 91.75   |
| $\Delta$ (T)                  | 6.17      | 10.20   | 10.32   |         |         |         | 11.89   |
| $\Delta$ T                    | -1.89     | -2.98   |         |         |         |         | -2.98   |
| $\Delta$ Q <sup>b</sup>       | 2.38      |         |         |         |         |         | 2.38    |
| Sum                           |           |         |         |         |         |         | 32.65   |

<sup>a</sup> ACVXZ basis sets and all-electron calculations unless specified.  $\Delta$ T are dzp (DZ) and tz2p (TZ) results (CBS is tz2p value), while  $\Delta$ Q are dzp (DZ) results. <sup>b</sup> Frozen-core results.



Table S2: Calculated equilibrium  $^{15}\text{N}$  NMR shielding in NF cations. Units of ppm.

| Contribution <sup>a</sup>   | Basis Set |         |         |         |         |         | CBS     |
|-----------------------------|-----------|---------|---------|---------|---------|---------|---------|
|                             | DZ        | TZ      | QZ      | 5Z      | 6Z      | 7Z      |         |
| $\text{N}_2\text{F}^+$ , N1 |           |         |         |         |         |         |         |
| SCF                         | 46.00     | 30.00   | 26.50   | 25.10   | 24.66   | 24.58   | 24.56   |
| $\Delta\text{SD}$           | 31.42     | 25.17   | 24.81   |         |         |         | 24.56   |
| $\Delta(\text{T})$          | 1.46      | 2.75    | 2.83    |         |         |         | 2.89    |
| $\Delta\text{T}$            | -0.04     | -0.38   |         |         |         |         | -0.38   |
| $\Delta\text{Q}^b$          | 0.48      |         |         |         |         |         | 0.48    |
| Sum                         |           |         |         |         |         |         | 52.12   |
| $\text{N}_2\text{F}^+$ , N2 |           |         |         |         |         |         |         |
| SCF                         | -8.24     | -23.09  | -26.90  | -28.56  | -29.06  | -29.15  | -29.17  |
| $\Delta\text{SD}$           | 63.02     | 53.91   | 52.95   |         |         |         | 52.25   |
| $\Delta(\text{T})$          | 6.16      | 8.45    | 8.64    |         |         |         | 8.78    |
| $\Delta\text{T}$            | -0.96     | -1.50   |         |         |         |         | -1.50   |
| $\Delta\text{Q}^b$          | 1.78      |         |         |         |         |         | 1.78    |
| Sum                         |           |         |         |         |         |         | 32.14   |
| $\text{NF}_2^+$             |           |         |         |         |         |         |         |
| SCF                         | -712.79   | -742.70 | -754.89 | -760.06 | -761.56 | -761.83 | -761.89 |
| $\Delta\text{SD}$           | 275.93    | 242.04  | 240.03  |         |         |         | 238.57  |
| $\Delta(\text{T})$          | 49.98     | 58.36   | 59.57   |         |         |         | 60.45   |
| $\Delta\text{T}$            | -8.87     | -10.76  |         |         |         |         | -10.76  |
| $\Delta\text{Q}^b$          | 3.25      |         |         |         |         |         | 3.25    |
| Sum                         |           |         |         |         |         |         | -470.38 |
| $\text{NH}_3\text{F}^+$     |           |         |         |         |         |         |         |
| SCF                         | 157.48    | 144.21  | 142.21  | 141.41  | 141.15  | 141.11  | 141.09  |
| $\Delta\text{SD}$           | 4.00      | 2.23    | 1.77    |         |         |         | 1.43    |
| $\Delta(\text{T})$          | -1.24     | -1.12   | -1.14   |         |         |         | -1.16   |
| $\Delta\text{T}$            | -0.37     | -0.25   |         |         |         |         | -0.25   |
| $\Delta\text{Q}^b$          | 0.06      |         |         |         |         |         | 0.06    |
| Sum                         |           |         |         |         |         |         | 141.01  |
| $\text{NH}_2\text{F}_2^+$   |           |         |         |         |         |         |         |
| SCF                         | 84.49     | 68.73   | 65.94   | 64.83   | 64.49   | 64.42   | 64.41   |
| $\Delta\text{SD}$           | -2.46     | -6.13   | -6.84   |         |         |         | -7.35   |
| $\Delta(\text{T})$          | -4.26     | -4.56   | -4.67   |         |         |         | -4.76   |
| $\Delta\text{T}$            | -0.55     | -0.61   |         |         |         |         | -0.61   |
| $\Delta\text{Q}^b$          | -0.27     |         |         |         |         |         | -0.27   |
| Sum                         |           |         |         |         |         |         | 51.42   |

Continued on next page

| continued                          |           |         |         |         |         |         |         |
|------------------------------------|-----------|---------|---------|---------|---------|---------|---------|
| Contribution <sup>a</sup>          | Basis Set |         |         |         |         |         | CBS     |
|                                    | DZ        | TZ      | QZ      | 5Z      | 6Z      | 7Z      |         |
| <b>NHF<sub>3</sub><sup>+</sup></b> |           |         |         |         |         |         |         |
| SCF                                | 32.27     | 15.72   | 12.43   | 11.08   | 10.66   | 10.58   | 10.57   |
| ΔSD                                | -5.20     | -10.85  | -11.66  |         |         |         | -12.26  |
| Δ(T)                               | -5.83     | -6.37   | -6.56   |         |         |         | -6.69   |
| ΔT <sup>b</sup>                    | -0.23     | -0.30   |         |         |         |         | -0.30   |
| Sum                                |           |         |         |         |         |         | -8.68   |
| <b>NF<sub>4</sub><sup>+</sup></b>  |           |         |         |         |         |         |         |
| SCF                                | -10.59    | -27.45  | -31.07  | -32.64  | -33.12  | -33.21  | -33.23  |
| ΔSD                                | -3.58     | -11.27  | -12.07  |         |         |         | -12.65  |
| Δ(T)                               | -5.73     | -6.43   | -6.64   |         |         |         | -6.80   |
| ΔT <sup>b</sup>                    | 0.29      | 0.20    |         |         |         |         | 0.20    |
| Sum                                |           |         |         |         |         |         | -52.49  |
| <b>ONHF<sup>+</sup></b>            |           |         |         |         |         |         |         |
| SCF                                | -82.66    | -103.94 | -108.33 | -110.27 | -110.85 | -110.96 | -110.98 |
| ΔSD                                | 48.83     | 38.99   | 38.01   |         |         |         | 37.30   |
| Δ(T)                               | 0.59      | 2.50    | 2.57    |         |         |         | 2.62    |
| ΔT                                 | -0.47     | -0.93   |         |         |         |         | -0.93   |
| ΔQ <sup>b</sup>                    | 0.95      |         |         |         |         |         | 0.95    |
| Sum                                |           |         |         |         |         |         | -71.05  |
| <b>ONF<sub>2</sub><sup>+</sup></b> |           |         |         |         |         |         |         |
| SCF                                | -43.43    | -64.69  | -68.66  | -70.45  | -70.99  | -71.09  | -71.11  |
| ΔSD                                | 36.39     | 28.20   | 27.67   |         |         |         | 27.29   |
| Δ(T)                               | -1.11     | 0.79    | 0.85    |         |         |         | 0.89    |
| ΔT                                 | 0.38      | -0.09   |         |         |         |         | -0.09   |
| Sum                                |           |         |         |         |         |         | -43.02  |
| <b>HNNF<sup>2+</sup>, N1</b>       |           |         |         |         |         |         |         |
| SCF                                | 97.73     | 86.26   | 83.61   | 82.44   | 82.10   | 82.03   | 82.02   |
| ΔSD                                | 34.71     | 28.82   | 28.30   |         |         |         | 27.92   |
| Δ(T)                               | 3.55      | 5.03    | 5.12    |         |         |         | 5.18    |
| ΔT                                 | -0.39     | -0.70   |         |         |         |         | -0.70   |
| ΔQ <sup>b</sup>                    | 0.81      |         |         |         |         |         | 0.81    |
| Sum                                |           |         |         |         |         |         | 115.23  |

Continued on next page

| continued                     |           |         |         |         |         |         |         |
|-------------------------------|-----------|---------|---------|---------|---------|---------|---------|
| Contribution <sup>a</sup>     | Basis Set |         |         |         |         |         | CBS     |
|                               | DZ        | TZ      | QZ      | 5Z      | 6Z      | 7Z      |         |
| HNNF <sup>2+</sup> , N2       |           |         |         |         |         |         |         |
| SCF                           | 53.88     | 36.13   | 32.93   | 31.59   | 31.17   | 31.10   | 31.08   |
| $\Delta$ SD                   | 28.65     | 23.44   | 23.10   |         |         |         | 22.86   |
| $\Delta$ (T)                  | 0.83      | 2.14    | 2.19    |         |         |         | 2.23    |
| $\Delta$ T                    | -0.30     | -0.67   |         |         |         |         | -0.67   |
| $\Delta$ Q <sup>b</sup>       | 0.57      |         |         |         |         |         | 0.57    |
| Sum                           |           |         |         |         |         |         | 56.08   |
| FNNF <sup>2+</sup>            |           |         |         |         |         |         |         |
| SCF                           | 86.77     | 72.66   | 69.80   | 68.59   | 68.22   | 68.15   | 68.14   |
| $\Delta$ SD                   | 30.53     | 25.20   | 24.81   |         |         |         | 24.53   |
| $\Delta$ (T)                  | 1.91      | 3.38    | 3.44    |         |         |         | 3.49    |
| $\Delta$ T                    | -0.26     | -0.66   |         |         |         |         | -0.66   |
| Sum                           |           |         |         |         |         |         | 95.50   |
| NF <sub>3</sub> <sup>2+</sup> |           |         |         |         |         |         |         |
| SCF                           | -245.99   | -270.18 | -276.03 | -278.87 | -279.71 | -279.87 | -279.90 |
| $\Delta$ SD                   | 109.42    | 94.85   | 94.16   |         |         |         | 93.66   |
| $\Delta$ (T)                  | 22.51     | 26.40   | 26.75   |         |         |         | 27.01   |
| $\Delta$ T                    | -1.262    | -2.47   |         |         |         |         | -2.47   |
| Sum                           |           |         |         |         |         |         | -161.71 |
| ONF <sup>2+</sup>             |           |         |         |         |         |         |         |
| SCF                           | -45.03    | -63.88  | -68.25  | -70.10  | -70.67  | -70.77  | -70.79  |
| $\Delta$ SD                   | 62.89     | 55.08   | 54.62   |         |         |         | 54.28   |
| $\Delta$ (T)                  | 6.99      | 9.82    | 10.03   |         |         |         | 10.18   |
| $\Delta$ T                    | -0.82     | -1.55   |         |         |         |         | -1.55   |
| $\Delta$ Q <sup>b</sup>       | 2.00      |         |         |         |         |         | 2.00    |
| Sum                           |           |         |         |         |         |         | -5.89   |

<sup>a</sup> ACVXZ basis sets and all-electron calculations unless specified.  $\Delta$ T are dzp (DZ) and tz2p (TZ) results (CBS is tz2p value), while  $\Delta$ Q are dzp (DZ) results. <sup>b</sup> Frozen-core results.

## Solvent effects

Effect of solvation on calculated chemical shielding of N-F cations. Calculated at the RI-MP2/aug-cc-pwCVTZ (all-electron) and TPSS/pcSseg-3 levels of theory within Orca 5.0.3. Solvent model is CPCM with parameters for water and acetonitrile. The solvent effect is calculated as the difference between gas phase and solvated results, calculated at the CCSD(T)-F12b/cc-pVQZ-F12 optimized geometries used in this work.

Table S3: Solvent effect on shielding constants of N-F cations. Units of ppm

| Molecule                                    | RI-MP2/aug-cc-pwCVTZ |        |                 |        | TPSS/pcSseg-3   |        |                 |        |
|---------------------------------------------|----------------------|--------|-----------------|--------|-----------------|--------|-----------------|--------|
|                                             | <sup>19</sup> F      |        | <sup>15</sup> N |        | <sup>19</sup> F |        | <sup>15</sup> N |        |
|                                             | water                | acn    | water           | acn    | water           | acn    | water           | acn    |
| NHF <sup>+</sup>                            | 98.25                | 96.51  | -38.12          | -37.60 | 108.59          | 106.86 | 41.17           | 40.55  |
| NNF <sup>+</sup>                            | 0.89                 | 1.00   | -1.24           | -1.21  | 1.57            | 1.56   | -2.20           | -2.16  |
| NF <sub>2</sub> <sup>+</sup>                | 8.98                 | 8.82   | -6.47           | -6.38  | 16.66           | 16.40  | 5.28            | 5.20   |
| NH <sub>3</sub> F <sup>+</sup>              | 31.69                | 31.10  | -9.56           | -9.38  | 34.25           | 33.68  | -8.31           | -8.15  |
| NH <sub>2</sub> F <sub>2</sub> <sup>+</sup> | 17.80                | 17.50  | -6.85           | -6.72  | 21.39           | 21.04  | -6.22           | -6.10  |
| NHF <sub>3</sub> <sup>+</sup>               | 11.00                | 10.83  | -2.69           | -2.64  | 12.94           | 12.74  | -3.00           | -2.94  |
| NF <sub>4</sub> <sup>+</sup>                | 1.14                 | 1.12   | -0.20           | -0.19  | 1.30            | 1.28   | -0.26           | -0.25  |
| ONHF <sup>+</sup>                           | 30.79                | 30.28  | -4.25           | -4.17  | 35.32           | 34.74  | -8.37           | -8.22  |
| ONF <sub>2</sub> <sup>+</sup>               | 7.75                 | 7.62   | 1.96            | 1.93   | 7.73            | 7.61   | 0.64            | 0.63   |
| NF <sup>2+</sup>                            | 1.13                 | 1.12   | 0.75            | 0.74   | 10.50           | 10.34  | 4.21            | 4.14   |
| NH <sub>2</sub> F <sup>2+</sup>             | 110.94               | 108.93 | -31.28          | -30.77 | 106.78          | 105.00 | -11.73          | -11.52 |
| NHF <sub>2</sub> <sup>2+</sup>              | 32.26                | 31.68  | -19.77          | -19.46 | 44.21           | 43.49  | -7.53           | -7.40  |
| NF <sub>3</sub> <sup>2+</sup>               | 7.61                 | 7.48   | -3.80           | -3.74  | 14.26           | 14.03  | 1.72            | 1.70   |
| HNNF <sup>2+</sup>                          | 22.41                | 22.00  | 4.58            | 4.49   | 25.96           | 25.50  | 4.83            | 4.73   |
| FNNF <sup>2+</sup>                          | 15.43                | 15.16  | 1.68            | 1.65   | 18.94           | 18.63  | 1.43            | 1.40   |
| ONF <sup>2+</sup>                           | 6.07                 | 5.96   | -0.25           | -0.25  | 7.85            | 7.73   | -0.11           | -0.11  |

## DFT results

Table S4: DFT/aug-cc-pVTZ calculated equilibrium geometry shielding constants of  $\text{HNF}^+$  and  $\text{H}_2\text{NF}^{2+}$ . Units of ppm. <sup>a</sup>

| Method                     | $^{19}\text{F}$ | $^{15}\text{N}$ | $^1\text{H}$ |
|----------------------------|-----------------|-----------------|--------------|
| $\text{HNF}^+$             |                 |                 |              |
| B3LYP                      | -1883.2         | -1795.0         | 5.2          |
| BP86                       | -1937.1         | -1689.9         | 5.4          |
| KT2                        | -1327.3         | -1160.1         | 9.2          |
| PBE0                       | -2019.0         | -1934.5         | 3.8          |
| CC/CBS                     | -1394.4         | -1283.1         | 9.3          |
| $\text{H}_2\text{NF}^{2+}$ |                 |                 |              |
| B3LYP                      | -2403.0         | -2455.6         | -12.2        |
| BP86                       | -2409.5         | -2275.0         | -11.0        |
| KT2                        | -1497.9         | -1424.9         | -0.2         |
| PBE0                       | -2692.0         | -2758.0         | -16.7        |
| CC/CBS                     | -1044.0         | -453.9          | 12.9         |

<sup>a</sup> CC/CBS is the coupled-cluster CBS extrapolated value.

# Basis sets

Hydrogen aug-cc-pV7Z

Primitives: 13s, 7p, 6d, 5f, 4g, 3h, 2i

Contracted: 8s, 7p, 6d, 5f, 4g, 3h, 2i

includes aug/diffuse functions of 1s, 1p, 1d, 1f, 1g, 1h, 1i

\$ HYDROGEN

\$ S-TYPE FUNCTIONS

```
13 8 0
7190.929446 0.000009 0.00000000 0.00000000 0.00000000 0.00000000 0.00000000
0.000000 0.000000
1076.486444 0.000068 0.00000000 0.00000000 0.00000000 0.00000000 0.00000000
0.000000 0.000000
266.962197 0.000312 0.00000000 0.00000000 0.00000000 0.00000000 0.00000000
0.000000 0.000000
80.908646 0.001227 0.00000000 0.00000000 0.00000000 0.00000000 0.00000000
0.000000 0.000000
27.603338 0.004274 0.00000000 0.00000000 0.00000000 0.00000000 0.00000000
0.000000 0.000000
10.128123 0.013908 0.00000000 0.00000000 0.00000000 0.00000000 0.00000000
0.000000 0.000000
3.801505 0.044520 1.00000000 0.00000000 0.00000000 0.00000000 0.00000000
0.000000 0.000000
1.493506 0.097438 0.00000000 1.00000000 0.00000000 0.00000000 0.00000000
0.000000 0.000000
0.679975 0.249320 0.00000000 0.00000000 1.00000000 0.00000000 0.00000000
0.000000 0.000000
0.274449 0.278658 0.00000000 0.00000000 0.00000000 1.00000000 0.00000000
0.000000 0.000000
0.127783 0.166929 0.00000000 0.00000000 0.00000000 0.00000000 1.00000000
0.000000 0.000000
0.061164 0.031442 0.00000000 0.00000000 0.00000000 0.00000000 0.00000000
1.000000 0.000000
0.018167 0.000000 0.00000000 0.00000000 0.00000000 0.00000000 0.00000000
0.000000 1.000000
```

\$ P-TYPE FUNCTIONS

```
7 7 0
14.7287063 1.00000000 0.00000000 0.00000000 0.00000000 0.00000000 0.00000000
0.00000000
6.2076095 0.00000000 1.00000000 0.00000000 0.00000000 0.00000000 0.00000000
0.00000000
2.6162797 0.00000000 0.00000000 1.00000000 0.00000000 0.00000000 0.00000000
0.00000000
1.1026659 0.00000000 0.00000000 0.00000000 1.00000000 0.00000000 0.00000000
0.00000000
0.4647333 0.00000000 0.00000000 0.00000000 0.00000000 1.00000000 0.00000000
0.00000000
0.1958680 0.00000000 0.00000000 0.00000000 0.00000000 0.00000000 1.00000000
0.00000000
0.0628034 0.00000000 0.00000000 0.00000000 0.00000000 0.00000000 0.00000000
```

```

1.0000000
$ D-TYPE FUNCTIONS
6 6 0
6.312687 1.00000000 0.00000000 0.00000000 0.00000000 0.00000000 0.00000000
2.874992 0.00000000 1.00000000 0.00000000 0.00000000 0.00000000 0.00000000
1.309360 0.00000000 0.00000000 1.00000000 0.00000000 0.00000000 0.00000000
0.596323 0.00000000 0.00000000 0.00000000 1.00000000 0.00000000 0.00000000
0.271584 0.00000000 0.00000000 0.00000000 0.00000000 1.00000000 0.00000000
0.103144 0.00000000 0.00000000 0.00000000 0.00000000 0.00000000 1.00000000
$ F-TYPE FUNCTIONS
5 5 0
6.6492797 1.00000000 0.00000000 0.00000000 0.00000000 0.00000000
3.1175378 0.00000000 1.00000000 0.00000000 0.00000000 0.00000000
1.4616684 0.00000000 0.00000000 1.00000000 0.00000000 0.00000000
0.6853083 0.00000000 0.00000000 0.00000000 1.00000000 0.00000000
0.2244438 0.00000000 0.00000000 0.00000000 0.00000000 1.00000000
$ G-TYPE FUNCTIONS
4 4 0
4.5265189 1.00000000 0.00000000 0.00000000 0.00000000
2.1475220 0.00000000 1.00000000 0.00000000 0.00000000
1.0188515 0.00000000 0.00000000 1.00000000 0.00000000
0.2817031 0.00000000 0.00000000 0.00000000 1.00000000
$ H-TYPE FUNCTIONS
3 3 0
3.5953260 1.00000000 0.00000000 0.00000000
1.4712160 0.00000000 1.00000000 0.00000000
0.5043276 0.00000000 0.00000000 1.00000000
$ I-TYPE FUNCTIONS
2 2 0
3.5686210 1.00000000 0.00000000
0.8578942 0.00000000 1.00000000

```

Hydrogen aug-cc-pV8Z

Primitives: 15s, 8p, 7d, 6f, 5g, 4h, 3i, 2k

Contracted: 9s, 8p, 7d, 6f, 5g, 4h, 3i, 2k

includes aug/diffuse functions of 1s, 1p, 1d, 1f, 1g, 1h, 1i, 1k

```

$ S-TYPE FUNCTIONS
15 9 0
23615.6098119 0.000002 0.00000000 0.00000000 0.00000000 0.00000000 0.00000000
0.0000000 0.000000 0.00000000
3536.5524944 0.000016 0.00000000 0.00000000 0.00000000 0.00000000 0.00000000
0.0000000 0.000000 0.00000000
871.7746818 0.000070 0.00000000 0.00000000 0.00000000 0.00000000 0.00000000
0.0000000 0.000000 0.00000000
278.9755882 0.000249 0.00000000 0.00000000 0.00000000 0.00000000 0.00000000
0.0000000 0.000000 0.00000000
97.4378245 0.000895 0.00000000 0.00000000 0.00000000 0.00000000 0.00000000
0.0000000 0.000000 0.00000000
35.9568780 0.002840 0.00000000 0.00000000 0.00000000 0.00000000 0.00000000
0.0000000 0.000000 0.00000000

```

|            |          |            |            |            |            |            |
|------------|----------|------------|------------|------------|------------|------------|
| 14.2727331 | 0.008454 | 0.00000000 | 0.00000000 | 0.00000000 | 0.00000000 | 0.00000000 |
| 0.0000000  | 0.000000 | 0.00000000 |            |            |            |            |
| 5.9898527  | 0.021467 | 1.00000000 | 0.00000000 | 0.00000000 | 0.00000000 | 0.00000000 |
| 0.0000000  | 0.000000 | 0.00000000 |            |            |            |            |
| 2.7879534  | 0.050343 | 0.00000000 | 1.00000000 | 0.00000000 | 0.00000000 | 0.00000000 |
| 0.0000000  | 0.000000 | 0.00000000 |            |            |            |            |
| 1.1754980  | 0.124305 | 0.00000000 | 0.00000000 | 1.00000000 | 0.00000000 | 0.00000000 |
| 0.0000000  | 0.000000 | 0.00000000 |            |            |            |            |
| 0.5995840  | 0.230482 | 0.00000000 | 0.00000000 | 0.00000000 | 1.00000000 | 0.00000000 |
| 0.0000000  | 0.000000 | 0.00000000 |            |            |            |            |
| 0.2520867  | 0.278324 | 0.00000000 | 0.00000000 | 0.00000000 | 0.00000000 | 1.00000000 |
| 0.0000000  | 0.000000 | 0.00000000 |            |            |            |            |
| 0.1168822  | 0.148197 | 0.00000000 | 0.00000000 | 0.00000000 | 0.00000000 | 0.00000000 |
| 1.0000000  | 0.000000 | 0.00000000 |            |            |            |            |
| 0.0564851  | 0.022470 | 0.00000000 | 0.00000000 | 0.00000000 | 0.00000000 | 0.00000000 |
| 0.0000000  | 1.000000 | 0.00000000 |            |            |            |            |
| 0.0172689  | 0.000000 | 0.00000000 | 0.00000000 | 0.00000000 | 0.00000000 | 0.00000000 |
| 0.0000000  | 0.000000 | 1.00000000 |            |            |            |            |

\$ P-TYPE FUNCTIONS

8 8 0

|            |            |            |            |            |            |            |
|------------|------------|------------|------------|------------|------------|------------|
| 19.9350960 | 1.00000000 | 0.00000000 | 0.00000000 | 0.00000000 | 0.00000000 | 0.00000000 |
| 0.0000000  | 0.00000000 |            |            |            |            |            |
| 9.0576305  | 0.00000000 | 1.00000000 | 0.00000000 | 0.00000000 | 0.00000000 | 0.00000000 |
| 0.0000000  | 0.00000000 |            |            |            |            |            |
| 4.1153888  | 0.00000000 | 0.00000000 | 1.00000000 | 0.00000000 | 0.00000000 | 0.00000000 |
| 0.0000000  | 0.00000000 |            |            |            |            |            |
| 1.8698516  | 0.00000000 | 0.00000000 | 0.00000000 | 1.00000000 | 0.00000000 | 0.00000000 |
| 0.0000000  | 0.00000000 |            |            |            |            |            |
| 0.8495783  | 0.00000000 | 0.00000000 | 0.00000000 | 0.00000000 | 1.00000000 | 0.00000000 |
| 0.0000000  | 0.00000000 |            |            |            |            |            |
| 0.3860110  | 0.00000000 | 0.00000000 | 0.00000000 | 0.00000000 | 0.00000000 | 1.00000000 |
| 0.0000000  | 0.00000000 |            |            |            |            |            |
| 0.1753864  | 0.00000000 | 0.00000000 | 0.00000000 | 0.00000000 | 0.00000000 | 0.00000000 |
| 1.0000000  | 0.00000000 |            |            |            |            |            |
| 0.0639571  | 0.00000000 | 0.00000000 | 0.00000000 | 0.00000000 | 0.00000000 | 0.00000000 |
| 0.0000000  | 1.00000000 |            |            |            |            |            |

\$ D-TYPE FUNCTIONS

7 7 0

|           |            |            |            |            |            |            |
|-----------|------------|------------|------------|------------|------------|------------|
| 8.9420070 | 1.00000000 | 0.00000000 | 0.00000000 | 0.00000000 | 0.00000000 | 0.00000000 |
| 0.0000000 |            |            |            |            |            |            |
| 4.3682241 | 0.00000000 | 1.00000000 | 0.00000000 | 0.00000000 | 0.00000000 | 0.00000000 |
| 0.0000000 |            |            |            |            |            |            |
| 2.1339037 | 0.00000000 | 0.00000000 | 1.00000000 | 0.00000000 | 0.00000000 | 0.00000000 |
| 0.0000000 |            |            |            |            |            |            |
| 1.0424248 | 0.00000000 | 0.00000000 | 0.00000000 | 1.00000000 | 0.00000000 | 0.00000000 |
| 0.0000000 |            |            |            |            |            |            |
| 0.5092307 | 0.00000000 | 0.00000000 | 0.00000000 | 0.00000000 | 1.00000000 | 0.00000000 |
| 0.0000000 |            |            |            |            |            |            |
| 0.2487623 | 0.00000000 | 0.00000000 | 0.00000000 | 0.00000000 | 0.00000000 | 1.00000000 |
| 0.0000000 |            |            |            |            |            |            |
| 0.1031437 | 0.00000000 | 0.00000000 | 0.00000000 | 0.00000000 | 0.00000000 | 0.00000000 |
| 1.0000000 |            |            |            |            |            |            |

\$ F-TYPE FUNCTIONS

6 6 0

|           |            |            |            |            |            |            |
|-----------|------------|------------|------------|------------|------------|------------|
| 9.5998430 | 1.00000000 | 0.00000000 | 0.00000000 | 0.00000000 | 0.00000000 | 0.00000000 |
| 4.8033678 | 0.00000000 | 1.00000000 | 0.00000000 | 0.00000000 | 0.00000000 | 0.00000000 |



|           |            |            |            |            |            |            |
|-----------|------------|------------|------------|------------|------------|------------|
| 2.4034083 | 0.00000000 | 0.00000000 | 1.00000000 | 0.00000000 | 0.00000000 | 0.00000000 |
| 1.2025670 | 0.00000000 | 0.00000000 | 0.00000000 | 1.00000000 | 0.00000000 | 0.00000000 |
| 0.6017152 | 0.00000000 | 0.00000000 | 0.00000000 | 0.00000000 | 1.00000000 | 0.00000000 |
| 0.2131359 | 0.00000000 | 0.00000000 | 0.00000000 | 0.00000000 | 0.00000000 | 1.00000000 |

\$ G-TYPE FUNCTIONS

5 5 0

|           |            |            |            |            |            |
|-----------|------------|------------|------------|------------|------------|
| 5.7626060 | 1.00000000 | 0.00000000 | 0.00000000 | 0.00000000 | 0.00000000 |
| 2.9625557 | 0.00000000 | 1.00000000 | 0.00000000 | 0.00000000 | 0.00000000 |
| 1.5230499 | 0.00000000 | 0.00000000 | 1.00000000 | 0.00000000 | 0.00000000 |
| 0.7830000 | 0.00000000 | 0.00000000 | 0.00000000 | 1.00000000 | 0.00000000 |
| 0.3084796 | 0.00000000 | 0.00000000 | 0.00000000 | 0.00000000 | 1.00000000 |

\$ H-TYPE FUNCTIONS

4 4 0

|           |            |            |            |            |
|-----------|------------|------------|------------|------------|
| 4.7736170 | 1.00000000 | 0.00000000 | 0.00000000 | 0.00000000 |
| 2.5298977 | 0.00000000 | 1.00000000 | 0.00000000 | 0.00000000 |
| 1.3407825 | 0.00000000 | 0.00000000 | 1.00000000 | 0.00000000 |
| 0.4545281 | 0.00000000 | 0.00000000 | 0.00000000 | 1.00000000 |

\$ I-TYPE FUNCTIONS

3 3 0

|           |            |            |            |
|-----------|------------|------------|------------|
| 4.9694530 | 1.00000000 | 0.00000000 | 0.00000000 |
| 2.1727890 | 0.00000000 | 1.00000000 | 0.00000000 |
| 0.7082765 | 0.00000000 | 0.00000000 | 1.00000000 |

\$ K-TYPE FUNCTIONS

2 2 0

|       |            |            |
|-------|------------|------------|
| 4.162 | 1.00000000 | 0.00000000 |
| 1.022 | 0.00000000 | 1.00000000 |
